# Supplementary material
Source: PubMed Central journal article supplement (PMC1855424)
Supplement: pnas_0609824104_6.pdf [file pnas_0609824104_6.pdf]

**Table 5. Selected bond critical points (BCPs) and ring critical points (RCPs) for [Rh(PR<sub>3</sub>)(Binor-S)]<sup>+</sup> [R = <sup>i</sup>Pr (1), R = Cy (2)]**

| BCP | Atoms             | Signature | 1        |                  |            | 2        |                  |            |
|-----|-------------------|-----------|----------|------------------|------------|----------|------------------|------------|
|     |                   |           | $\rho_b$ | $\nabla^2\rho_b$ | $\epsilon$ | $\rho_b$ | $\nabla^2\rho_b$ | $\epsilon$ |
| 1   | C(25)-C(21)       | (3, -1)   | 0.1771   | -0.08693         | 1.670742   | 0.1817   | -0.09211         | 1.441      |
| 2   | C(25)-C(26)       | (3, -1)   | 0.2374   | -0.4104          | 0.280953   | 0.2362   | -0.4125          | 0.2542     |
| 3   | C(21)-C(26)       | (3, -1)   | 0.2359   | -0.4015          | 0.281686   | 0.2369   | -0.4041          | 0.2991     |
| 4   | C(25)-C(21)-C(26) | (3, +1)   | 0.1725   | 0.1323           | -          | 0.1752   | 0.1484           | -          |
| 5   | C(25)-H(25)       | (3, -1)   | 0.2558   | -0.8080          | 0.040093   | 0.2584   | -0.8254          | 0.0388     |
| 6   | C(21)-H(21)       | (3, -1)   | 0.2563   | -0.8123          | 0.040241   | 0.2609   | -0.8414          | 0.03784    |
| 7   | Rh-C(25)-C(21)    | (3, +1)   | 0.06818  | 0.20130          | -          | 0.06186  | 0.1854           | -          |
| 8   | Rh-C(25)          | (3, -1)   | 0.07075  | 0.18600          | 0.840406   | 0.06404  | 0.1732           | 0.9363     |
| 9   | Rh-C(21)          | (3, -1)   | 0.07054  | 0.18700          | 0.875989   | 0.06328  | 0.1716           | 1.188      |
| 10  | C(15)-C(16)       | (3, -1)   | 0.2359   | -0.4696          | 0.019244   | 0.2346   | -0.4569          | 0.02707    |
| 11  | C(16)-C(11)       | (3, -1)   | 0.2376   | -0.4699          | 0.027961   | 0.2357   | -0.4608          | 0.02755    |
| 12  | C(15)-H(15)       | (3, -1)   | 0.2598   | -0.8344          | 0.011742   | 0.2589   | -0.8278          | 0.01412    |
| 13  | C(11)-H(11)       | (3, -1)   | 0.2590   | -0.8308          | 0.010432   | 0.2598   | -0.8327          | 0.01395    |
| 14  | Rh-C(15)          | (3, -1)   | 0.1294   | 0.07425          | 0.031807   | 0.1317   | 0.07908          | 0.0164     |
| 15  | Rh-C(11)          | (3, -1)   | 0.1280   | 0.07367          | 0.034884   | 0.1304   | 0.07574          | 0.00981    |
| 16  | Rh-C(15)-C(11)    | (3, +1)   | 0.06623  | 0.2154           | -          | 0.0654   | 0.2267           | -          |
| 17  | C(2)-H(2a)        | (3, -1)   | 0.246    | -0.7321          | 0.009851   | 0.2516   | -0.7683          | 0.006719   |
| 20  | Rh-H(2a)          | (3, -1)   | 0.02917  | 0.07906          | 0.679124   |          |                  |            |
