# Supplementary material
Source: PubMed Central journal article supplement (PMC1855424)
Supplement: pnas_0609824104_8.pdf [file pnas_0609824104_8.pdf]

**Table 7. Calculated bond lengths (Å) and angles (°) for [Rh(PR<sub>3</sub>)(Binor-S)]<sup>+</sup> [R = <sup>i</sup>Pr (1), R = Cy (2); R = H (4)] and the intermediate 4-Intd**

|                                      | <b>1</b>      | <b>2</b>      | <b>4</b>      | <b>4-Intd</b> |
|--------------------------------------|---------------|---------------|---------------|---------------|
| Rh...C(21) / Rh...C(25) / Å          | 2.418 / 2.416 | 2.328 / 2.321 | 2.226 / 2.227 | 2.050 / 2.043 |
| Rh-C(11) / Rh-C(15) / Å              | 2.056 / 2.056 | 2.021 / 2.019 | 2.029 / 2.029 | 2.054 / 2.063 |
| Rh- <i>HC</i> <sub>agostic</sub> / Å | 2.61          | 2.67 / 2.51   | -             | -             |
| Rh- <i>HC</i> <sub>agostic</sub> / Å | 3.218         | 2.979 / 3.253 | -             | -             |
| C(11)-Rh-C(15) / °                   | 65.9          | 66.4          | 66.4          | 63.6          |
| Rh-P / Å                             | 2.351         | 2.234         | 2.219         | 2.442         |
| P-Rh-C(15)                           | 98.5          | 98.5          | 90.1          | 135.5         |
| P-Rh-C(13)-C(16)                     | -1.2          | 0.2           | -0.4          | 56.0          |
| C(11)...C(15) / Å                    | 2.236         | 2.212         | 2.222         | 2.169         |
| C(21)-C(25)                          | 1.614         | 1.607         | 1.643         | 2.168         |
| C(21)-C(26)-C(25) / °                | 64.6          | 64.7          | 66.3          | 90.9          |
| C(21)-C(26)                          | 1.512         | 1.501         | 1.502         | 1.513         |
| C(26)-C(25)                          | 1.512         | 1.503         | 1.502         | 1.529         |
