# Supplementary material
Source: PubMed Central journal article supplement (PMC1855424)

**1 - 3**

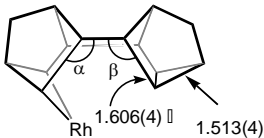

$\alpha$  116.5(3) - 118.3(3)  
 $\beta$  115.1(3) - 115.7(3)

**V**

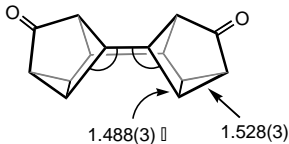

$\alpha, \beta$  113.2(1) - 114.7(1)

**VI**

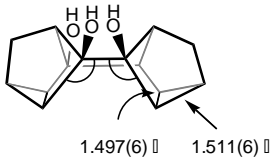

$\alpha, \beta$  113.6(3) - 115.2(3)

Supplement: pnas_0609824104_1.pdf [file pnas_0609824104_1.pdf]
